# Supplementary material for: Chemical oxidation of a double-twisted nanographene
Source: Royal Society of Chemistry journal article supplement (doi:10.1039/d4cc05264a), 2024-01-01
Supplement: d4cc05264a1.pdf [file d4cc05264a1.pdf]

## Supporting Information

### Chemical Oxidation of a Double-Twisted Nanographene

Zhiyu Zhang,<sup>1</sup> Yoshifumi Hashikawa,<sup>2\*</sup> and Chaolumen<sup>1\*</sup>

<sup>1</sup>*College of Chemistry and Chemical Engineering, Inner Mongolia University, Hohhot, 010021, China*

<sup>2</sup>*Institute for Chemical Research, Kyoto University, Uji, Kyoto 611-0011, Japan*

*E-mail: hashi@scl.kyoto-u.ac.jp; chaolumen@imu.edu.cn*

## Contents

|                                                     |     |
|-----------------------------------------------------|-----|
| 1. General                                          | S3  |
| 2. Computational Methods                            | S4  |
| 3. Synthesis of $\mathbf{1}^{2+}[\text{SbF}_6^-]_2$ | S5  |
| 4. Simulated $^{13}\text{C}$ NMR Spectrum           | S8  |
| 5. References                                       | S12 |

## 1. General

The  $^1\text{H}$  and  $^{13}\text{C}$  NMR measurements were carried out with a Bruker AVANCE NEO 600 MHz instrument. The NMR chemical shifts are reported in ppm with reference to residual protons and carbons of  $\text{CD}_2\text{Cl}_2$  ( $\delta$  5.32 ppm in  $^1\text{H}$  NMR,  $\delta$  53.84 ppm in  $^{13}\text{C}$  NMR) and  $\text{CD}_3\text{CN}$  ( $\delta$  118.26 ppm in  $^{13}\text{C}$  NMR). Centrifugation was performed on a Herexi TD5A centrifuge. The UV-vis-NIR absorption spectra were measured with a Shimadzu UV-3600i Plus spectrometer. The circular dichroism (CD) spectrum was recorded on a JASCO-J-1700 Circular Dichroism Spectrophotometer.

Dry  $\text{C}_2\text{H}_4\text{Cl}_2$  (1,2-dichloroethane) was purchased from Beijing InnoChem Science & Technology Co.  $\text{NOSbF}_6$  was purchased from Shanghai Aladdin Biochemical Technology Co., Ltd. *n*-Hexane was purchased from Shanghai Titan Scientific Co., Ltd. Unless otherwise noted, all commercial reagents and solvents were used as received and no further purification was performed.

A double-twisted nanographene (**1**)<sup>1</sup> was prepared according to literature procedures. The reaction was carried out under a nitrogen atmosphere.

## 2. Computational Methods

All calculations were performed using the Gaussian 09 program. All structures at the stationary states were optimized at the B3LYP-D3 level of theory with basis sets of SDD for Sb and 6-31G(d) for the rest without any symmetry assumptions and confirmed by frequency analysis at the same level of theory. The NMR chemical shifts were calculated at the GIAO-B3LYP-D3/6-311+G(2d,p) level of theory using the structure optimized at the aforementioned level. The NICS (nucleus-independent chemical shift) and ICSS (iso-chemical shielding surfaces) calculations were performed at the HF/6-31+G(d,p) level of theory using structures optimized at the aforementioned level, the latter of which was computed by Multiwfn 3.8-dev program.<sup>2,3</sup> ACID (anisotropy of current-induced density) plots were generated at the B3LYP-D3/6-31G(d) level of theory using structures optimized at the aforementioned level. Optical transitions were calculated at the TD-CAM-B3LYP-D3 level of theory with basis sets of SDD for Sb and 6-31G(d) for the rest using the structure optimized at the aforementioned level.

### 3. Synthesis of $1^{2+}[\text{SbF}_6^-]_2$

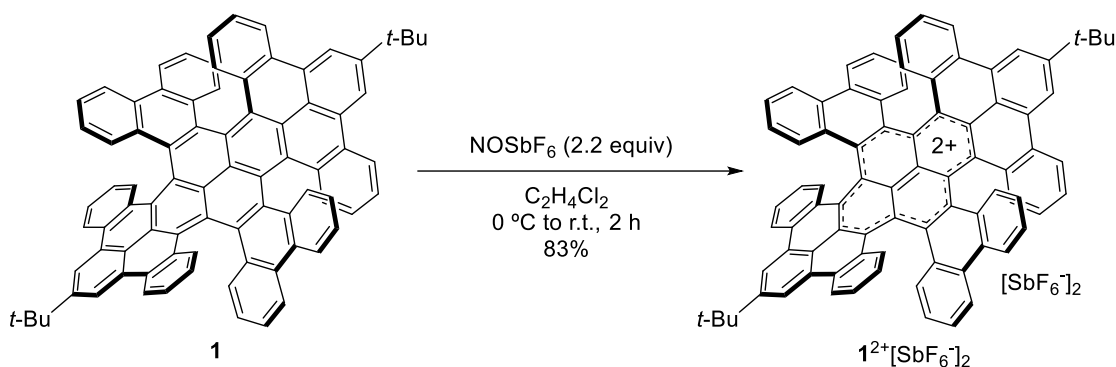

Powdery **1** (10 mg, 9.4  $\mu\text{mol}$ ) and  $\text{NOSbF}_6$  (5.5 mg, 0.021 mmol, 2.2 equiv) were added into a 50 mL two-neck flask and degassed through three vacuum- $\text{N}_2$  cycles. Dry  $\text{C}_2\text{H}_4\text{Cl}_2$  (10 mL) was added at  $0\text{ }^\circ\text{C}$ . During the process that the solution was allowed to warm up to room temperature for 2 h, the compounds were mostly precipitated. The resulting solid was collected by centrifugation (3000 rpm, 10 min) using  $\text{C}_2\text{H}_4\text{Cl}_2/n\text{-hexane}$  (1:20) for three times ( $21\text{ mL} \times 3$ ) to give  $1^{2+}[\text{SbF}_6^-]_2$  (12 mg, 7.8  $\mu\text{mol}$ , 83%) as a brown powder.

$(MM,MMMM)\text{-}1^{2+}[\text{SbF}_6^-]_2$  was prepared in a similar manner using  $(MM,MMMM)\text{-}1$ .

$1^{2+}[\text{SbF}_6^-]_2$ :  $^1\text{H}$  NMR (600 MHz,  $\text{CD}_2\text{Cl}_2$ )  $\delta$  9.10 (s, 4H), 8.77 (d,  $J = 8.0$  Hz, 4H), 8.29 (d,  $J = 7.9$  Hz, 4H), 7.77 (t,  $J = 8.0$  Hz, 4H), 7.56 (d,  $J = 8.0$  Hz, 4H), 7.46 (t,  $J = 7.9$  Hz, 4H), 7.17 (d,  $J = 8.0$  Hz, 4H), 7.11 (d,  $J = 7.9$  Hz, 4H), 6.95 (t,  $J = 7.9$  Hz, 4H), 1.73 (s, 18H);  $^{13}\text{C}$  NMR (151 MHz,  $\text{CD}_2\text{Cl}_2/\text{CD}_3\text{CN}$  (5:1))  $\delta$  155.67, 158.53, 144.35, 139.89, 137.32, 136.43, 136.36, 135.71, 133.51, 132.13, 130.62, 130.32, 130.06, 129.87, 129.77, 128.56, 128.52, 127.78, 125.77, 125.39, 125.15, 36.26, 31.00 (The sum of carbon signals must be 23 in theory. Observed 23).

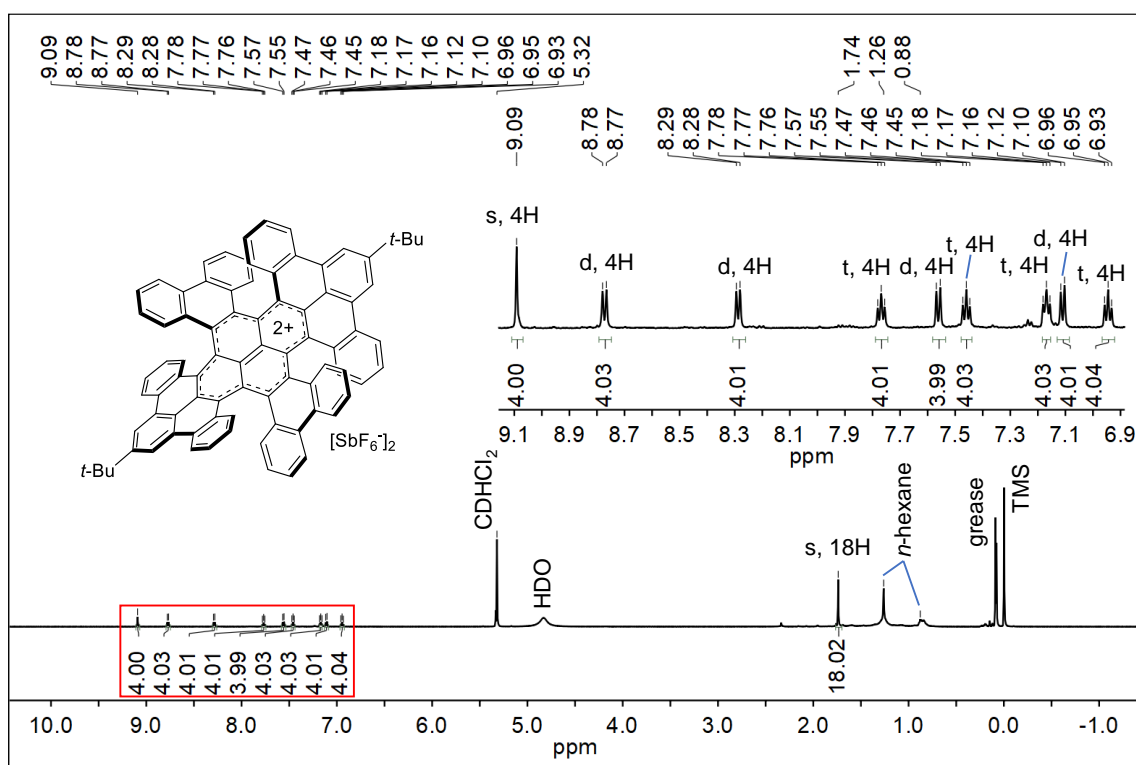

**Figure S1.**  $^1\text{H}$  NMR spectra (600 MHz,  $\text{CD}_2\text{Cl}_2$ ) of  $1^{2+}[\text{SbF}_6^-]_2$ .

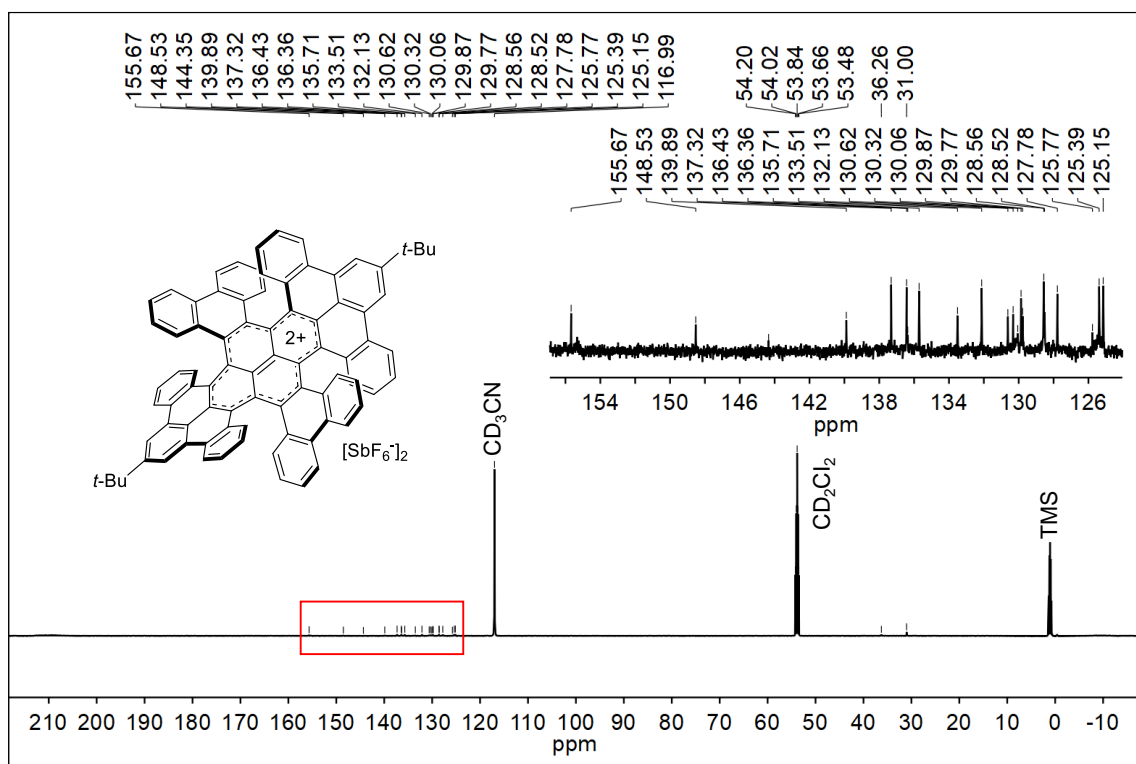

**Figure S2.**  $^{13}\text{C}$  NMR spectra (151 MHz,  $\text{CD}_2\text{Cl}_2/\text{CD}_3\text{CN}$  (5:1)) of  $1^{2+}[\text{SbF}_6^-]_2$ .

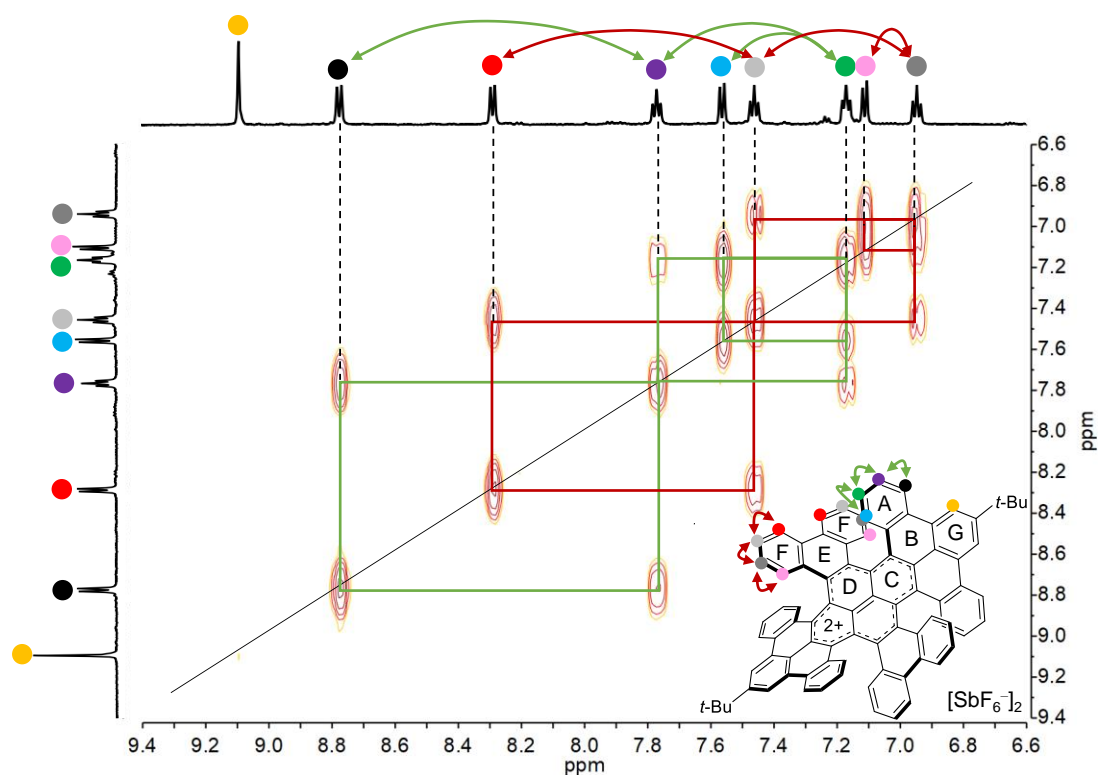

**Figure S3.** COSY spectrum (600 MHz,  $\text{CD}_2\text{Cl}_2$ , 298K) of  $1^{2+}[\text{SbF}_6^-]_2$ .

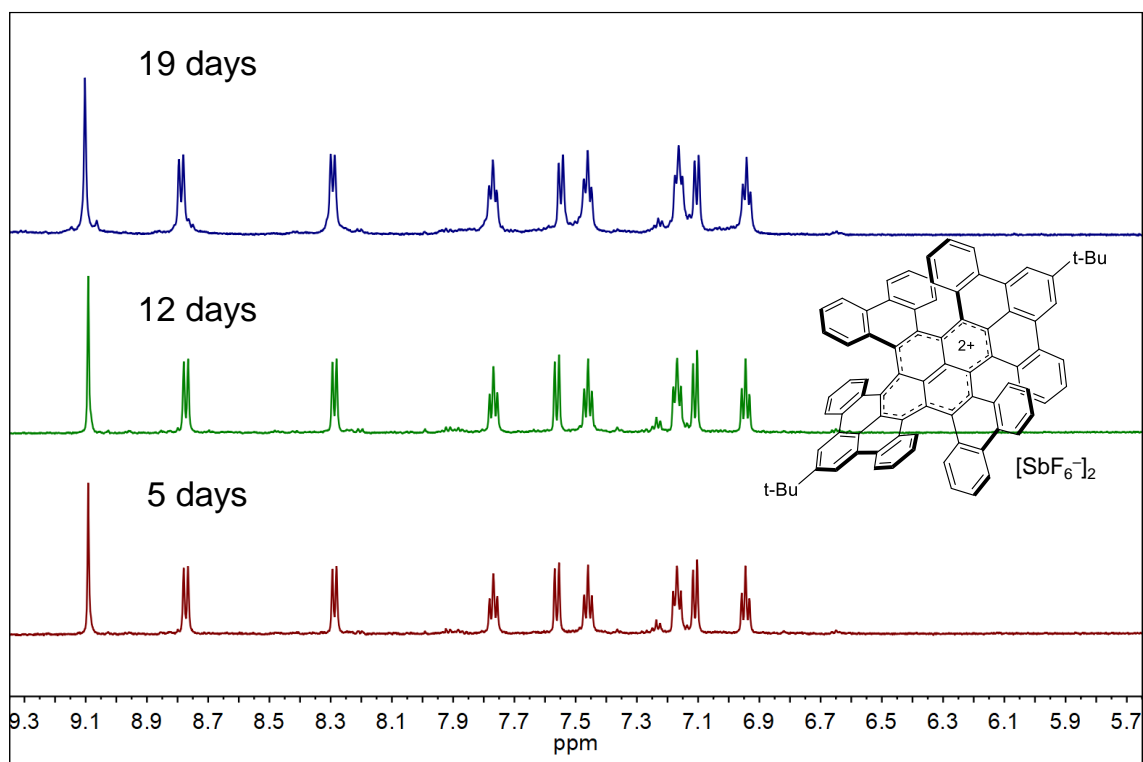

**Figure S4.** Spectral change in  $^1\text{H}$  NMR spectra (600 MHz,  $\text{CD}_2\text{Cl}_2$ ) of  $1^{2+}[\text{SbF}_6^-]_2$ .

## 4. Simulated $^{13}\text{C}$ NMR Spectrum

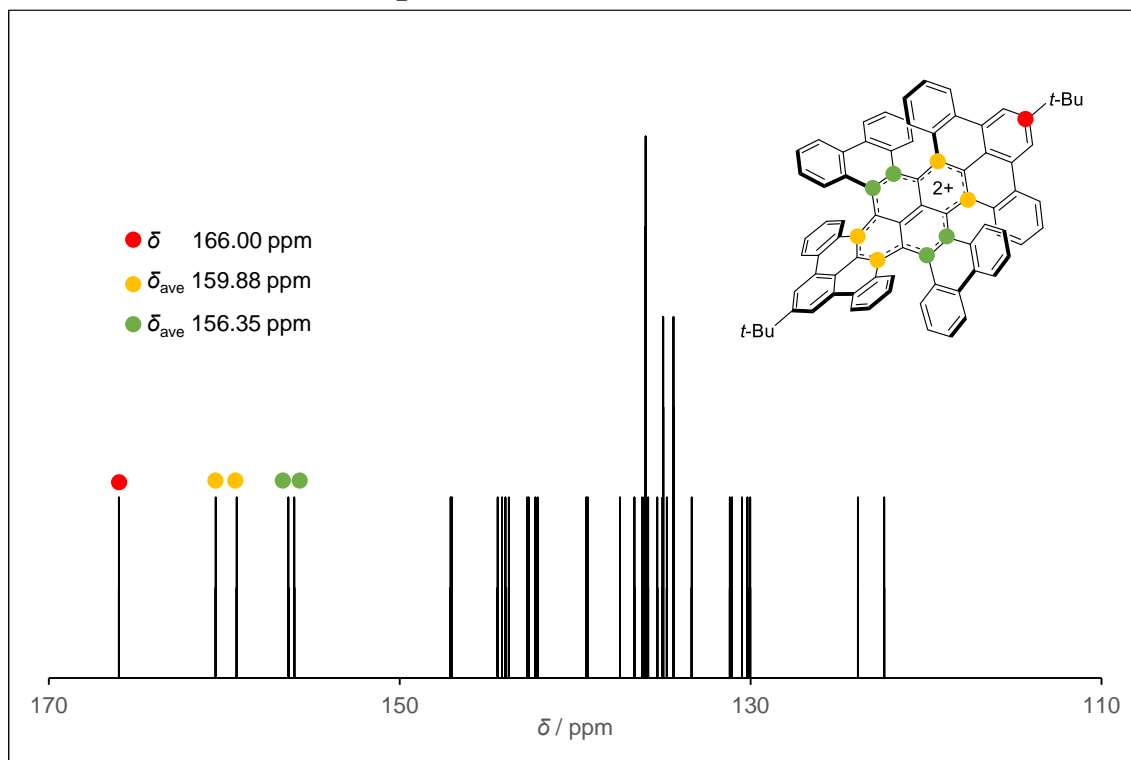

**Figure S5.** Simulated  $^{13}\text{C}$  NMR spectrum of  $1^{2+}$  (GIAO-B3LYP-D3/6-311+G(2d,p)//B3LYP-D3/6-31G(d)).

**Table S1.** Optimized structure of  $1^{2+}$  (B3LYP-D3/6-31G(d))

| Center Number | Atomic Number | Atomic Type | Coordinates (Angstroms) |           |           |
|---------------|---------------|-------------|-------------------------|-----------|-----------|
|               |               |             | X                       | Y         | Z         |
| 6             | 6             | 0           | 0.033072                | 7.732707  | -0.026250 |
| 7             | 6             | 0           | -1.726073               | 4.852540  | 1.753152  |
| 8             | 6             | 0           | 1.776971                | 4.827065  | -1.765950 |
| 9             | 6             | 0           | -2.452192               | 5.447777  | 2.800069  |
| 10            | 6             | 0           | -3.152898               | 4.675428  | 3.719440  |
| 11            | 6             | 0           | -3.139175               | 3.272689  | 3.643755  |
| 12            | 6             | 0           | -2.476291               | 2.653240  | 2.604163  |
| 13            | 6             | 0           | -1.796000               | 3.426866  | 1.632612  |
| 14            | 6             | 0           | 1.836531                | 3.400987  | -1.636912 |
| 15            | 6             | 0           | 2.514548                | 2.617082  | -2.602410 |
| 16            | 6             | 0           | 3.185099                | 3.225559  | -3.642900 |
| 17            | 6             | 0           | 3.210003                | 4.628209  | -3.726063 |
| 18            | 6             | 0           | 2.512335                | 5.410830  | -2.813968 |
| 19            | 6             | 0           | -1.036942               | 2.779468  | 0.608509  |
| 20            | 6             | 0           | -1.211235               | 1.402028  | 0.181553  |
| 21            | 6             | 0           | 0.004372                | 0.703359  | 0.000629  |
| 22            | 6             | 0           | 1.228539                | 1.386799  | -0.180520 |
| 23            | 6             | 0           | 1.071152                | 2.765870  | -0.611094 |
| 24            | 6             | 0           | 0.021641                | 3.482882  | -0.002013 |
| 25            | 6             | 0           | -2.447588               | 0.730974  | 0.017575  |
| 26            | 6             | 0           | -2.456242               | -0.701579 | -0.012988 |
| 27            | 6             | 0           | -1.228539               | -1.386799 | -0.180520 |
| 28            | 6             | 0           | -0.004372               | -0.703359 | 0.000629  |
| 29            | 6             | 0           | -1.071152               | -2.765870 | -0.611094 |
| 30            | 6             | 0           | -0.021641               | -3.482882 | -0.002013 |
| 31            | 6             | 0           | 1.036942                | -2.779468 | 0.608509  |
| 32            | 6             | 0           | 1.211235                | -1.402028 | 0.181553  |
| 33            | 6             | 0           | 2.447588                | -0.730974 | 0.017575  |
| 34            | 6             | 0           | 2.456242                | 0.701579  | -0.012988 |
| 35            | 6             | 0           | -3.696232               | 1.426826  | -0.289183 |

Standard orientation:



|    |   |   |           |           |           |     |    |   |           |            |           |
|----|---|---|-----------|-----------|-----------|-----|----|---|-----------|------------|-----------|
| 36 | 6 | 0 | -4.931060 | 0.727221  | -0.218988 | 96  | 1  | 0 | -4.827148 | 4.389842   | -1.568021 |
| 37 | 6 | 0 | -4.939209 | -0.667795 | 0.227692  | 97  | 1  | 0 | -7.011479 | 3.198750   | -1.333520 |
| 38 | 6 | 0 | -3.713093 | -1.382792 | 0.294267  | 98  | 1  | 0 | -7.058477 | 0.872139   | -0.571846 |
| 39 | 6 | 0 | -3.689615 | 2.740087  | -0.810739 | 99  | 1  | 0 | -7.067319 | -0.785803  | 0.586592  |
| 40 | 6 | 0 | -4.863981 | 3.383466  | -1.162145 | 100 | 1  | 0 | -7.047737 | -3.113404  | 1.346632  |
| 41 | 6 | 0 | -6.086209 | 2.710955  | -1.040472 | 101 | 1  | 0 | -4.878101 | -4.332629  | 1.572674  |
| 42 | 6 | 0 | -6.110194 | 1.396920  | -0.595289 | 102 | 1  | 0 | -2.785499 | -3.209660  | 0.991706  |
| 43 | 6 | 0 | -6.125737 | -1.322641 | 0.606990  | 103 | 1  | 0 | 7.067319  | 0.785803   | 0.586592  |
| 44 | 6 | 0 | -6.117225 | -2.637148 | 1.051225  | 104 | 1  | 0 | 7.047737  | 3.113404   | 1.346632  |
| 45 | 6 | 0 | -4.903311 | -3.325294 | 1.168271  | 105 | 1  | 0 | 4.878101  | 4.332629   | 1.572674  |
| 46 | 6 | 0 | -3.721810 | -2.696722 | 0.813776  | 106 | 1  | 0 | 2.785499  | 3.209660   | 0.991706  |
| 47 | 6 | 0 | 3.696232  | -1.426826 | -0.289183 | 107 | 1  | 0 | 2.747266  | -3.240302  | -0.992986 |
| 48 | 6 | 0 | 4.931060  | -0.727221 | -0.218988 | 108 | 1  | 0 | 4.827148  | -4.389842  | -1.568021 |
| 49 | 6 | 0 | 4.939209  | 0.667795  | 0.227692  | 109 | 1  | 0 | 7.011479  | -3.198750  | -1.333520 |
| 50 | 6 | 0 | 3.713093  | 1.382792  | 0.294267  | 110 | 1  | 0 | 7.058477  | -0.872139  | -0.571846 |
| 51 | 6 | 0 | 6.125737  | 1.322641  | 0.606990  | 111 | 1  | 0 | -1.609793 | -7.544227  | -1.465486 |
| 52 | 6 | 0 | 6.117225  | 2.637148  | 1.051225  | 112 | 1  | 0 | 1.544209  | -7.571325  | 1.417803  |
| 53 | 6 | 0 | 4.903311  | 3.325294  | 1.168271  | 113 | 1  | 0 | -2.411872 | -1.539491  | -2.586392 |
| 54 | 6 | 0 | 3.721810  | 2.696722  | 0.813776  | 114 | 1  | 0 | -3.645547 | -2.613086  | -4.410838 |
| 55 | 6 | 0 | 3.689615  | -2.740087 | -0.810739 | 115 | 1  | 0 | -3.740949 | -5.110992  | -4.541917 |
| 56 | 6 | 0 | 4.863981  | -3.383466 | -1.162145 | 116 | 1  | 0 | -2.503359 | -6.486465  | -2.951647 |
| 57 | 6 | 0 | 6.086209  | -2.710955 | -1.040472 | 117 | 1  | 0 | 2.433637  | -6.524153  | 2.931554  |
| 58 | 6 | 0 | 6.110194  | -1.396920 | -0.595289 | 118 | 1  | 0 | 3.677014  | -5.166885  | 4.534523  |
| 59 | 6 | 0 | -0.932460 | -5.603793 | -0.853531 | 119 | 1  | 0 | 3.602024  | -2.667630  | 4.416113  |
| 60 | 6 | 0 | -0.916775 | -7.008643 | -0.831553 | 120 | 1  | 0 | 2.382050  | -1.574806  | 2.593462  |
| 61 | 6 | 0 | -0.033072 | -7.732707 | -0.026250 | 121 | 1  | 0 | 1.318818  | 9.428769   | 1.743846  |
| 62 | 6 | 0 | 0.855519  | -7.017146 | 0.790952  | 122 | 1  | 0 | 0.307820  | 10.861177  | 1.462596  |
| 63 | 6 | 0 | 0.878824  | -5.617953 | 0.831776  | 123 | 1  | 0 | -0.401825 | 9.397474   | 2.158229  |
| 64 | 6 | 0 | -0.026528 | -4.913970 | -0.007922 | 124 | 1  | 0 | -1.435287 | 10.860177  | -0.407039 |
| 65 | 6 | 0 | -1.776971 | -4.827065 | -1.765950 | 125 | 1  | 0 | -1.647515 | 9.426015   | -1.432593 |
| 66 | 6 | 0 | 1.726073  | -4.852540 | 1.753152  | 126 | 1  | 0 | -2.179160 | 9.399294   | 0.256445  |
| 67 | 6 | 0 | -1.836531 | -3.400987 | -1.636912 | 127 | 1  | 0 | 0.846817  | 9.601723   | -2.007242 |
| 68 | 6 | 0 | -2.514548 | -2.617082 | -2.602410 | 128 | 1  | 0 | 2.061246  | 9.604804   | -0.707674 |
| 69 | 6 | 0 | -3.185099 | -3.225559 | -3.642900 | 129 | 1  | 0 | 0.976175  | 10.983894  | -0.913501 |
| 70 | 6 | 0 | -3.210003 | -4.628209 | -3.726063 | 130 | 1  | 0 | -0.846817 | -9.601723  | -2.007242 |
| 71 | 6 | 0 | -2.512335 | -5.410830 | -2.813968 | 131 | 1  | 0 | -0.976175 | -10.983894 | -0.913501 |
| 72 | 6 | 0 | 2.452192  | -5.447777 | 2.800069  | 132 | 1  | 0 | -2.061246 | -9.604804  | -0.707674 |
| 73 | 6 | 0 | 3.152898  | -4.675428 | 3.719440  | 133 | 1  | 0 | -0.307820 | -10.861177 | 1.462596  |
| 74 | 6 | 0 | 3.139175  | -3.272689 | 3.643755  | 134 | 1  | 0 | 0.401825  | -9.397474  | 2.158229  |
| 75 | 6 | 0 | 2.476291  | -2.653240 | 2.604163  | 135 | 1  | 0 | -1.318818 | -9.428769  | 1.743846  |
| 76 | 6 | 0 | 1.796000  | -3.426866 | 1.632612  | 136 | 1  | 0 | 1.647515  | -9.426015  | -1.432593 |
| 77 | 6 | 0 | 0.006186  | 9.271086  | -0.004129 | 137 | 1  | 0 | 2.179160  | -9.399294  | 0.256445  |
| 78 | 6 | 0 | 0.325300  | 9.765401  | 1.426766  | 138 | 1  | 0 | 1.435287  | -10.860177 | -0.407039 |
| 79 | 6 | 0 | -1.399536 | 9.764398  | -0.420252 | 139 | 51 | 0 | 0.000000  | 0.000000   | 4.407569  |
| 80 | 6 | 0 | 1.035651  | 9.891547  | -0.967121 | 140 | 51 | 0 | 0.000000  | 0.000000   | -4.404251 |
| 81 | 6 | 0 | -0.006186 | -9.271086 | -0.004129 | 141 | 9  | 0 | -1.899453 | -0.077402  | -4.327786 |
| 82 | 6 | 0 | -1.035651 | -9.891547 | -0.967121 | 142 | 9  | 0 | 0.000000  | 0.000000   | -2.498909 |
| 83 | 6 | 0 | -0.325300 | -9.765401 | 1.426766  | 143 | 9  | 0 | 1.899453  | 0.077402   | -4.327786 |
| 84 | 6 | 0 | 1.399536  | -9.764398 | -0.420252 | 144 | 9  | 0 | 0.000000  | 0.000000   | -6.282824 |
| 85 | 1 | 0 | -1.544209 | 7.571325  | 1.417803  | 145 | 9  | 0 | -0.048629 | 1.888355   | -4.326276 |
| 86 | 1 | 0 | 1.609793  | 7.544227  | -1.465486 | 146 | 9  | 0 | 0.048629  | -1.888355  | -4.326276 |
| 87 | 1 | 0 | -2.433637 | 6.524153  | 2.931554  | 147 | 9  | 0 | 0.000000  | 0.000000   | 2.502236  |
| 88 | 1 | 0 | -3.677014 | 5.166885  | 4.534523  | 148 | 9  | 0 | 0.000000  | 0.000000   | 6.286119  |
| 89 | 1 | 0 | -3.602024 | 2.667630  | 4.416113  | 149 | 9  | 0 | -1.898202 | 0.103962   | 4.331260  |
| 90 | 1 | 0 | -2.382050 | 1.574806  | 2.593462  | 150 | 9  | 0 | -0.074524 | -1.887480  | 4.329408  |
| 91 | 1 | 0 | 2.411872  | 1.539491  | -2.586392 | 151 | 9  | 0 | 1.898202  | -0.103962  | 4.331260  |
| 92 | 1 | 0 | 3.645547  | 2.613086  | -4.410838 | 152 | 9  | 0 | 0.074524  | 1.887480   | 4.329408  |
| 93 | 1 | 0 | 3.740949  | 5.110992  | -4.541917 |     |    |   |           |            |           |
| 94 | 1 | 0 | 2.503359  | 6.486465  | -2.951647 |     |    |   |           |            |           |
| 95 | 1 | 0 | -2.747266 | 3.240302  | -0.992986 |     |    |   |           |            |           |

The total electronic energy was calculated to be -3233.366415 Hartree.

**Table S2.** Optimized structure of  $1^{2+}[\text{SbF}_6^-]_2$  (B3LYP-D3 with SDD for Sb and 6-31G(d) for the rest)

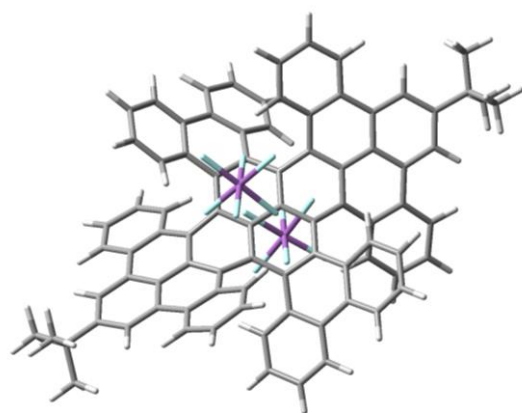

| Standard orientation: |               |             |                         |           |           |  |
|-----------------------|---------------|-------------|-------------------------|-----------|-----------|--|
| Center Number         | Atomic Number | Atomic Type | Coordinates (Angstroms) |           |           |  |
|                       |               |             | X                       | Y         | Z         |  |
| 1                     | 6             | 0           | -7.770102               | -0.114799 | -0.577357 |  |
| 2                     | 6             | 0           | -7.024684               | 0.950968  | -1.081345 |  |
| 3                     | 6             | 0           | -5.621791               | 0.997890  | -0.993338 |  |
| 4                     | 6             | 0           | -7.076961               | -1.153693 | 0.058448  |  |
| 5                     | 6             | 0           | -5.685619               | -1.152496 | 0.205547  |  |
| 6                     | 6             | 0           | -4.947491               | -0.071417 | -0.350630 |  |
| 7                     | 6             | 0           | -3.515365               | -0.061142 | -0.255652 |  |
| 8                     | 6             | 0           | -2.784340               | 1.091021  | -0.617794 |  |
| 9                     | 6             | 0           | -3.414066               | 2.088277  | -1.444812 |  |
| 10                    | 6             | 0           | -4.836109               | 2.071398  | -1.600532 |  |
| 11                    | 6             | 0           | -5.424915               | 3.091160  | -2.377618 |  |
| 12                    | 6             | 0           | -4.655139               | 4.048190  | -3.018055 |  |
| 13                    | 6             | 0           | -3.252496               | 3.998877  | -2.943473 |  |
| 14                    | 6             | 0           | -2.642360               | 3.028664  | -2.176336 |  |
| 15                    | 6             | 0           | -0.706041               | -0.067080 | -0.063513 |  |
| 16                    | 6             | 0           | -1.409023               | 1.161071  | -0.169816 |  |
| 17                    | 6             | 0           | -0.709267               | 2.364413  | 0.066837  |  |
| 18                    | 6             | 0           | -1.314737               | 3.593620  | 0.550614  |  |
| 19                    | 6             | 0           | -2.479661               | 3.536700  | 1.342427  |  |
| 20                    | 6             | 0           | -3.019709               | 4.699401  | 1.873390  |  |
| 21                    | 6             | 0           | -2.387638               | 5.928342  | 1.647264  |  |
| 22                    | 6             | 0           | -1.199781               | 5.986090  | 0.922605  |  |
| 23                    | 6             | 0           | -0.632598               | 4.826865  | 0.372361  |  |
| 24                    | 6             | 0           | 0.632856                | 4.826738  | -0.373325 |  |
| 25                    | 6             | 0           | 1.200107                | 5.985792  | -0.923854 |  |
| 26                    | 6             | 0           | 2.387929                | 5.927792  | -1.648556 |  |
| 27                    | 6             | 0           | 3.019894                | 4.698754  | -1.874436 |  |
| 28                    | 6             | 0           | 2.479785                | 3.536215  | -1.343174 |  |
| 29                    | 6             | 0           | 1.314909                | 3.593404  | -0.551310 |  |
| 30                    | 6             | 0           | 0.709375                | 2.364353  | -0.067213 |  |
| 31                    | 6             | 0           | 1.409099                | 1.161046  | 0.169717  |  |
| 32                    | 6             | 0           | 2.784398                | 1.091056  | 0.617712  |  |
| 33                    | 6             | 0           | 3.414169                | 2.088471  | 1.444525  |  |
| 34                    | 6             | 0           | 4.836200                | 2.071526  | 1.600314  |  |
| 35                    | 6             | 0           | 5.425032                | 3.091321  | 2.377323  |  |
| 36                    | 6             | 0           | 4.655283                | 4.048504  | 3.017582  |  |
| 37                    | 6             | 0           | 3.252650                | 3.999315  | 2.942876  |  |
| 38                    | 6             | 0           | 2.642488                | 3.029037  | 2.175825  |  |
| 39                    | 6             | 0           | -9.897894               | 1.039370  | -1.407600 |  |
| 40                    | 6             | 0           | -9.303086               | -0.184136 | -0.685631 |  |
| 41                    | 6             | 0           | -9.914193               | -0.249478 | 0.734199  |  |
| 42                    | 6             | 0           | -9.700715               | -1.451609 | -1.478129 |  |
| 43                    | 6             | 0           | 7.770140                | -0.114814 | 0.577261  |  |
| 44                    | 6             | 0           | 7.076969                | -1.153751 | -0.058440 |  |
| 45                    | 6             | 0           | 5.685619                | -1.152560 | -0.205468 |  |
| 46                    | 6             | 0           | 7.024751                | 0.951016  | 1.081169  |  |
| 47                    | 6             | 0           | 5.621858                | 0.997920  | 0.993243  |  |
| 48                    | 6             | 0           | 4.947522                | -0.071459 | 0.350699  |  |
| 49                    | 6             | 0           | 3.515386                | -0.061217 | 0.255832  |  |
| 50                    | 6             | 0           | 2.830694                | -1.195861 | -0.238663 |  |
| 51                    | 6             | 0           | 3.550517                | -2.139257 | -1.050475 |  |
| 52                    | 6             | 0           | 4.977115                | -2.159172 | -0.998154 |  |
| 53                    | 6             | 0           | 5.648637                | -3.121331 | -1.777209 |  |
| 54                    | 6             | 0           | 4.954923                | -3.974198 | -2.622961 |  |
| 55                    | 6             | 0           | 3.560299                | -3.870341 | -2.753763 |  |
| 56                    | 6             | 0           | 2.867083                | -2.963325 | -1.979371 |  |
| 57                    | 6             | 0           | 0.706805                | -0.067104 | 0.063670  |  |
| 58                    | 6             | 0           | 1.410459                | -1.292180 | 0.038080  |  |
| 59                    | 6             | 0           | 0.697134                | -2.518790 | 0.134947  |  |
| 60                    | 6             | 0           | 1.291807                | -3.763853 | 0.610192  |  |
| 61                    | 6             | 0           | 2.450192                | -3.749902 | 1.416713  |  |
| 62                    | 6             | 0           | 2.982289                | -4.921794 | 1.927373  |  |
| 63                    | 6             | 0           | 2.344807                | -6.143450 | 1.672161  |  |
| 64                    | 6             | 0           | 1.173083                | -6.171969 | 0.928681  |  |
| 65                    | 6             | 0           | 0.620802                | -4.995771 | 0.388358  |  |
| 66                    | 6             | 0           | -0.620986               | -4.995770 | -0.387621 |  |
| 67                    | 6             | 0           | -1.173317               | -6.171974 | -0.927874 |  |
| 68                    | 6             | 0           | -2.344998               | -6.143440 | -1.671427 |  |
| 69                    | 6             | 0           | -2.982371               | -4.921762 | -1.926799 |  |
| 70                    | 6             | 0           | -2.450227               | -3.749863 | -1.416203 |  |
| 71                    | 6             | 0           | -1.291911               | -3.763832 | -0.609583 |  |
| 72                    | 6             | 0           | -0.697205               | -2.518768 | -0.134394 |  |
| 73                    | 6             | 0           | -1.410475               | -1.292106 | -0.037633 |  |
| 74                    | 6             | 0           | -2.830703               | -1.195722 | 0.239042  |  |
| 75                    | 6             | 0           | -3.550576               | -2.139098 | 1.058088  |  |
| 76                    | 6             | 0           | -4.977169               | -2.159107 | 0.998285  |  |
| 77                    | 6             | 0           | -5.648722               | -3.121390 | 1.777157  |  |
| 78                    | 6             | 0           | -4.955060               | -3.974291 | 2.622921  |  |
| 79                    | 6             | 0           | -3.560468               | -3.870307 | 2.753963  |  |
| 80                    | 6             | 0           | -2.867217               | -2.963143 | 1.979770  |  |
| 81                    | 6             | 0           | 9.914213                | -0.249532 | -0.734341 |  |
| 82                    | 6             | 0           | 9.303127                | -0.184127 | 0.685494  |  |
| 83                    | 6             | 0           | 9.700807                | -1.451549 | 1.478064  |  |
| 84                    | 6             | 0           | 9.897915                | 1.039429  | 1.407388  |  |
| 85                    | 1             | 0           | -7.542779               | 1.764689  | -1.567595 |  |
| 86                    | 1             | 0           | -7.647311               | -1.980542 | 0.463370  |  |
| 87                    | 1             | 0           | -6.500426               | 3.124012  | -2.506243 |  |
| 88                    | 1             | 0           | -5.141318               | 4.813679  | -3.616557 |  |
| 89                    | 1             | 0           | -2.647179               | 4.700894  | -3.508460 |  |
| 90                    | 1             | 0           | -1.564856               | 2.932994  | -2.189045 |  |
| 91                    | 1             | 0           | -2.894924               | 2.569289  | 1.601962  |  |
| 92                    | 1             | 0           | -3.906029               | 4.645568  | 2.498080  |  |
| 93                    | 1             | 0           | -2.799312               | 6.838537  | 2.074531  |  |
| 94                    | 1             | 0           | -0.692517               | 6.939227  | 0.813139  |  |
| 95                    | 1             | 0           | 0.692924                | 6.938996  | -0.814589 |  |
| 96                    | 1             | 0           | 2.799646                | 6.837864  | -2.076043 |  |
| 97                    | 1             | 0           | 3.906176                | 4.644706  | -2.499163 |  |
| 98                    | 1             | 0           | 2.894960                | 2.568712  | -1.602510 |  |
| 99                    | 1             | 0           | 6.500534                | 3.124081  | 2.506049  |  |
| 100                   | 1             | 0           | 5.141486                | 4.814013  | 3.616037  |  |
| 101                   | 1             | 0           | 2.647340                | 4.701462  | 3.507707  |  |
| 102                   | 1             | 0           | 1.564973                | 2.933460  | 2.188483  |  |
| 103                   | 1             | 0           | -9.524920               | 1.127354  | -2.434503 |  |
| 104                   | 1             | 0           | -10.987657              | 0.940770  | -1.460118 |  |
| 105                   | 1             | 0           | -9.676957               | 1.972651  | -0.876925 |  |
| 106                   | 1             | 0           | -9.644076               | 0.638174  | 1.317157  |  |
| 107                   | 1             | 0           | -11.007868              | -0.299990 | 0.673501  |  |
| 108                   | 1             | 0           | -9.571167               | -1.129916 | 1.287668  |  |
| 109                   | 1             | 0           | -9.344059               | -2.366220 | -0.992856 |  |
| 110                   | 1             | 0           | -10.792027              | -1.521691 | -1.558567 |  |
| 111                   | 1             | 0           | -9.283890               | -1.424950 | -2.491315 |  |
| 112                   | 1             | 0           | 7.647289                | -1.980631 | -0.463343 |  |
| 113                   | 1             | 0           | 7.542878                | 1.764813  | 1.567262  |  |
| 114                   | 1             | 0           | 6.730964                | -3.177942 | -1.758980 |  |
| 115                   | 1             | 0           | 5.504497                | -4.691618 | -3.226137 |  |
| 116                   | 1             | 0           | 3.030774                | -4.473223 | -3.484388 |  |
| 117                   | 1             | 0           | 1.807530                | -2.810777 | -2.137856 |  |
| 118                   | 1             | 0           | 2.905092                | -2.801725 | 1.676811  |  |
| 119                   | 1             | 0           | 3.869603                | -4.885150 | 2.552248  |  |
| 120                   | 1             | 0           | 2.744279                | -7.065266 | 2.085474  |  |
| 121                   | 1             | 0           | 0.661922                | -7.118610 | 0.791079  |  |
| 122                   | 1             | 0           | -0.662230               | -7.118640 | -0.790168 |  |
| 123                   | 1             | 0           | -2.744506               | -7.065268 | -2.084677 |  |
| 124                   | 1             | 0           | -3.869627               | -4.885103 | -2.551756 |  |
| 125                   | 1             | 0           | -2.905025               | -2.801672 | -1.676429 |  |
| 126                   | 1             | 0           | -6.731040               | -3.178103 | 1.758772  |  |
| 127                   | 1             | 0           | -5.504665               | -4.691834 | 3.225921  |  |
| 128                   | 1             | 0           | -3.030999               | -4.473223 | 3.484603  |  |
| 129                   | 1             | 0           | -1.807728               | -2.810410 | 2.138515  |  |

|     |    |   |           |           |           |     |    |   |           |           |           |
|-----|----|---|-----------|-----------|-----------|-----|----|---|-----------|-----------|-----------|
| 130 | 1  | 0 | 9.644040  | 0.638067  | -1.317354 | 143 | 9  | 0 | 0.064192  | 1.467679  | -2.697248 |
| 131 | 1  | 0 | 11.007893 | -0.299982 | -0.673662 | 144 | 9  | 0 | 0.272903  | -1.171370 | -2.636678 |
| 132 | 1  | 0 | 9.571221  | -1.130025 | -1.287740 | 145 | 9  | 0 | 2.439836  | 0.397360  | -2.410250 |
| 133 | 1  | 0 | 9.344197  | -2.366202 | 0.992836  | 146 | 51 | 0 | -1.058050 | 0.197795  | 3.717952  |
| 134 | 1  | 0 | 10.792121 | -1.521574 | 1.558512  | 147 | 9  | 0 | 0.359326  | 0.038427  | 4.940222  |
| 135 | 1  | 0 | 9.283972  | -1.424854 | 2.491244  | 148 | 9  | 0 | -2.086397 | -1.139125 | 4.555626  |
| 136 | 1  | 0 | 9.525017  | 1.127414  | 2.434318  | 149 | 9  | 0 | -1.852080 | 1.584685  | 4.706815  |
| 137 | 1  | 0 | 10.987690 | 0.940902  | 1.459818  | 150 | 9  | 0 | -2.439974 | 0.397840  | 2.410446  |
| 138 | 1  | 0 | 9.676876  | 1.972686  | 0.876710  | 151 | 9  | 0 | -0.273239 | -1.170785 | 2.637241  |
| 139 | 51 | 0 | 1.057964  | 0.196806  | -3.717732 | 152 | 9  | 0 | -0.064103 | 1.468207  | 2.697054  |
| 140 | 9  | 0 | -0.359558 | 0.037354  | -4.939825 |     |    |   |           |           |           |
| 141 | 9  | 0 | 2.086266  | -1.140584 | -4.554743 |     |    |   |           |           |           |
| 142 | 9  | 0 | 1.852409  | 1.582958  | -4.707302 |     |    |   |           |           |           |

-----  
The total electronic energy was calculated to be -4442.9477363 Hartree.

## 5. References

- (1) Y. Dong, Z. Zhang, Y. Hashikawa, H. Meng, F. Bai, K. Itami and Chaolumen, *Angew. Chem. Int. Ed.*, 2024, **63**, e202406927.
- (2) T. Lu and F Chen, *J. Comput. Chem.*, 2012, **33**, 580–592.
- (3) Z. Liu, T. Lu and Q. Chen, *Carbon*, 2020, **165**, 468–475.
